# Supplementary material
Source: Springer Nature journal article supplement (https://www.springermedizin.de/resource/supplementary/12933_2011_461_MOESM5_ESM.pdf/9538530)

A. Distribution of comorbidities in nondiabetic and diabetic patients.

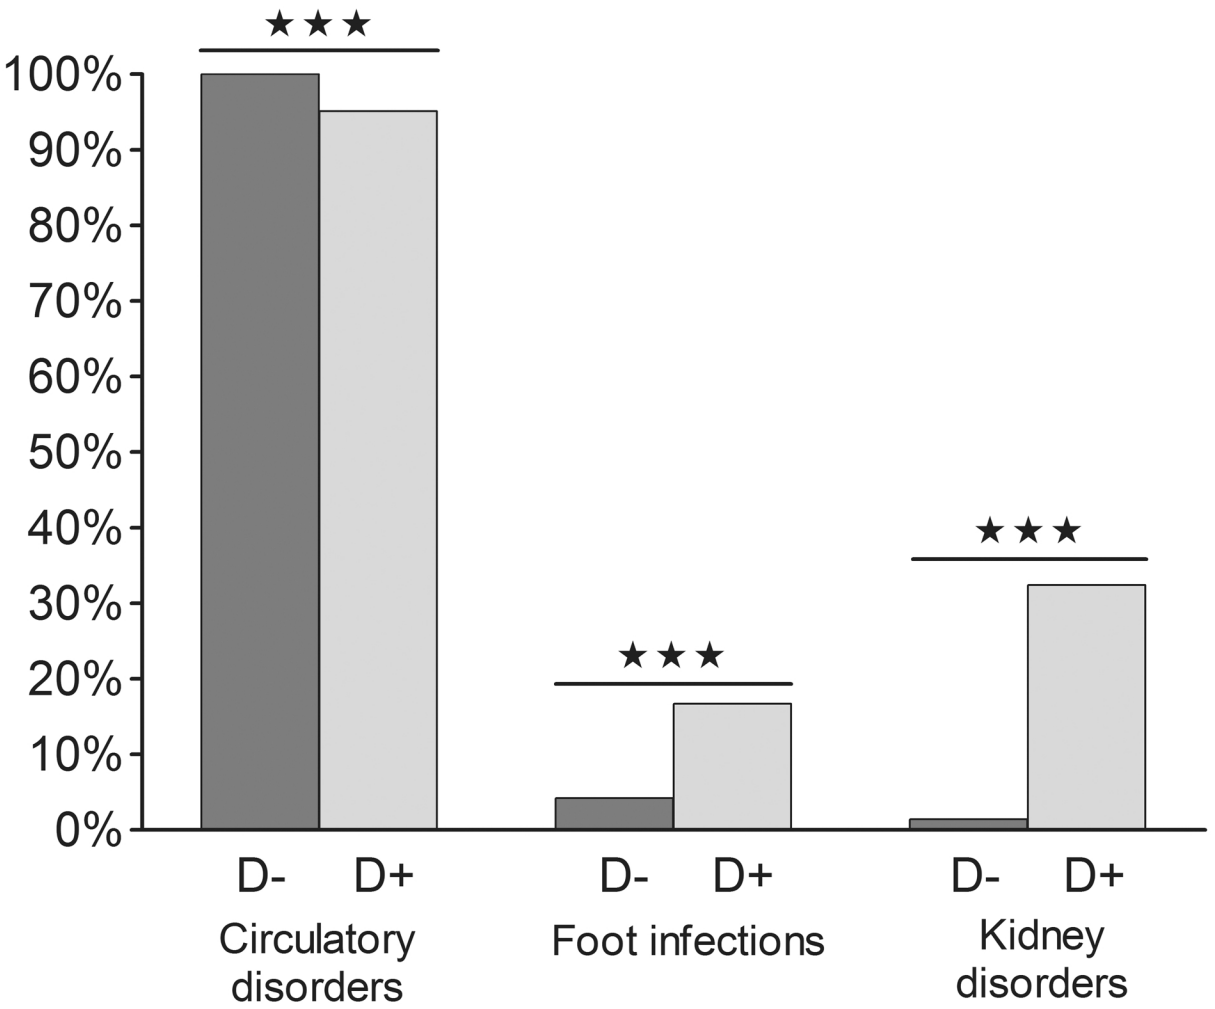

B. Distribution of comorbidities in diabetic female and male patients.

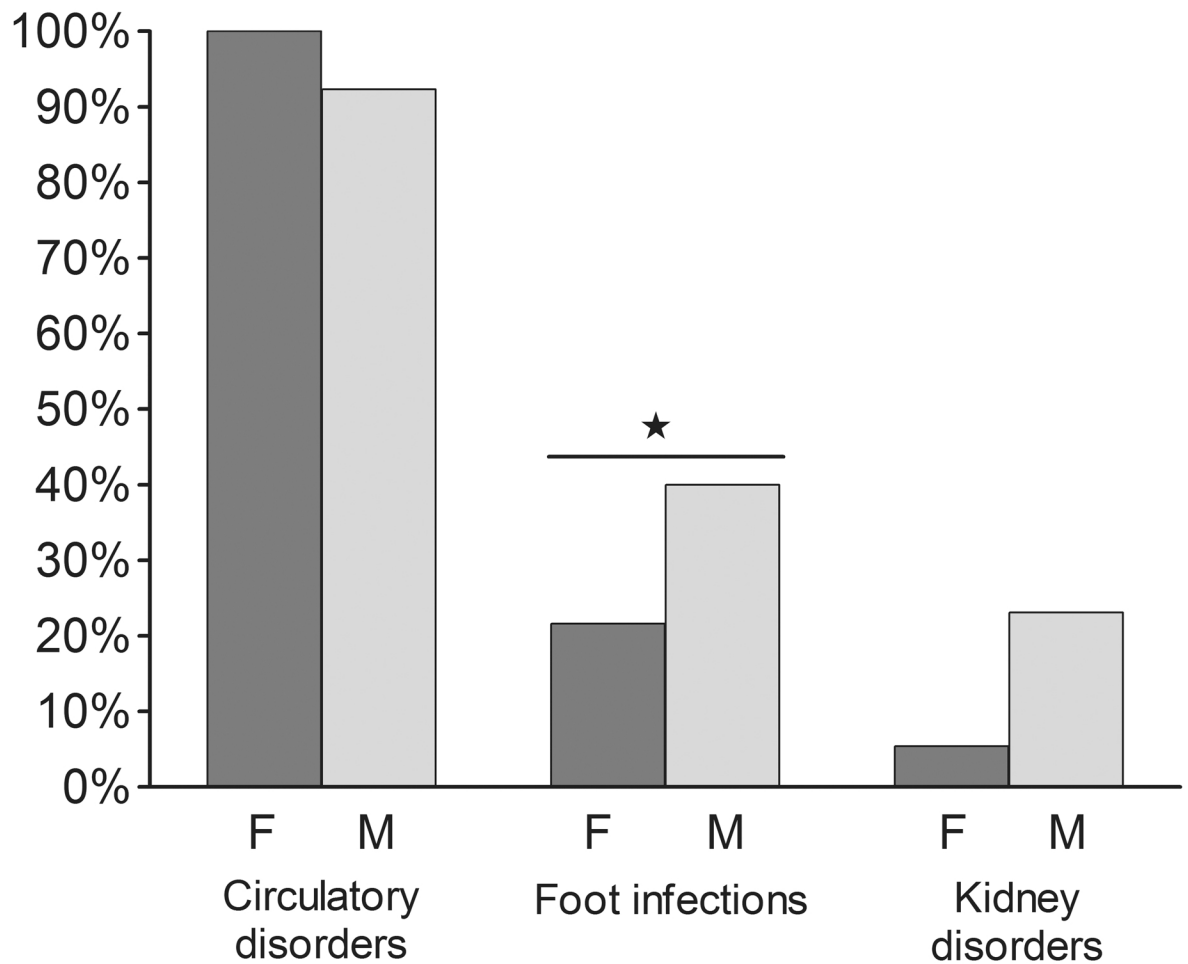

Supplement: MOESM5 [file 9538530]
